# Supplementary material
Source: PubMed Central journal article supplement (PMC3384193)

## Objects

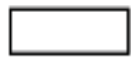

gene product, mostly protein but including RNA

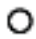

other molecule, mostly chemical compound

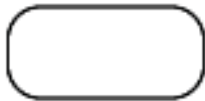

another map

## Arrows

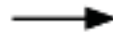

molecular interaction or relation

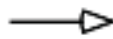

link to another map

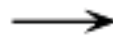

pointer used in legend

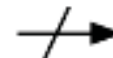

missing interaction (eg., by mutation)

## Protein-protein interactions

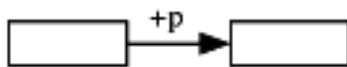

phosphorylation

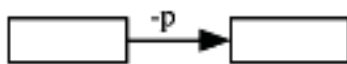

dephosphorylation

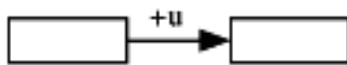

ubiquitination

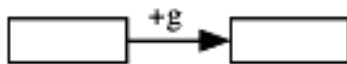

glycosylation

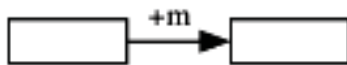

methylation

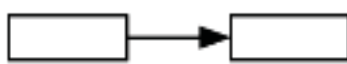

activation

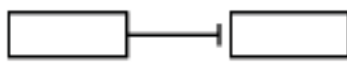

inhibition

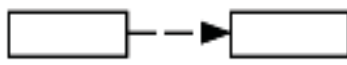

indirect effect

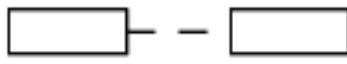

state change

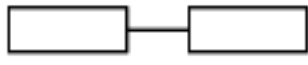

binding / association

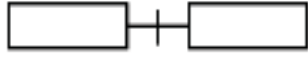

dissociation

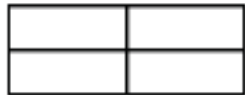

complex

## Gene expression relations

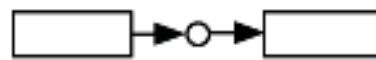

expression

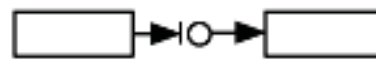

repression

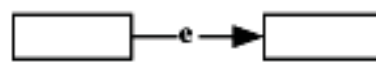

expression

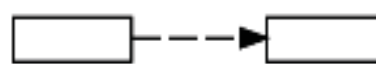

indirect effect

## Enzyme-enzyme relations

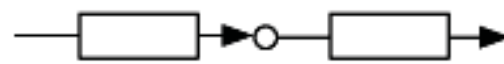

two successive reaction steps

**ACUTE MYELOID LEUKEMIA**

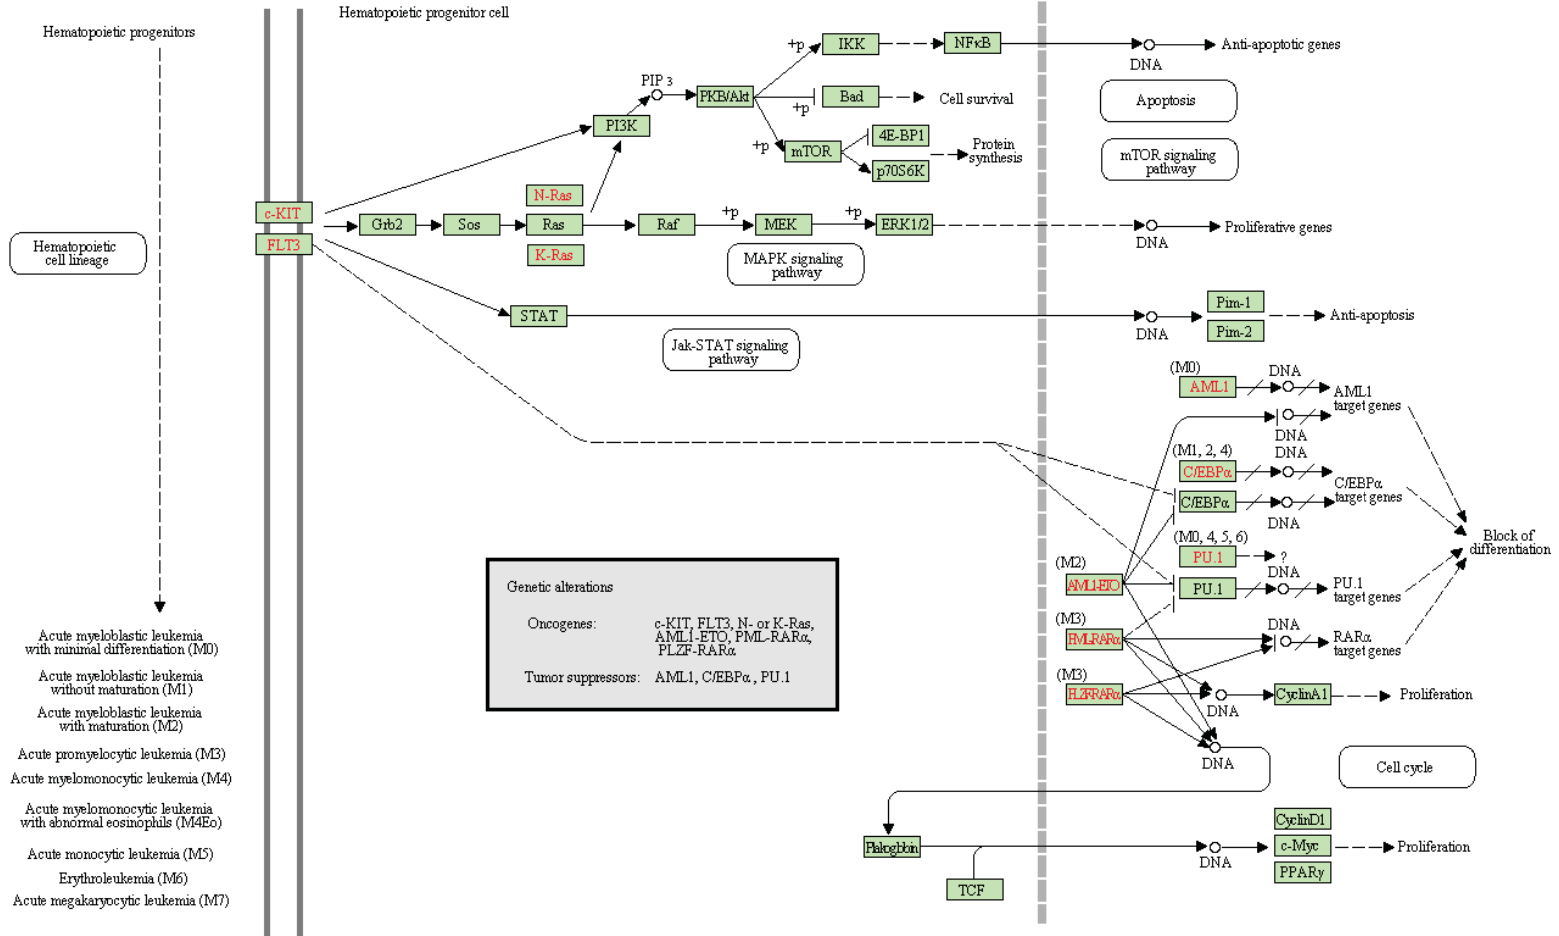

# BASAL CELL CARCINOMA

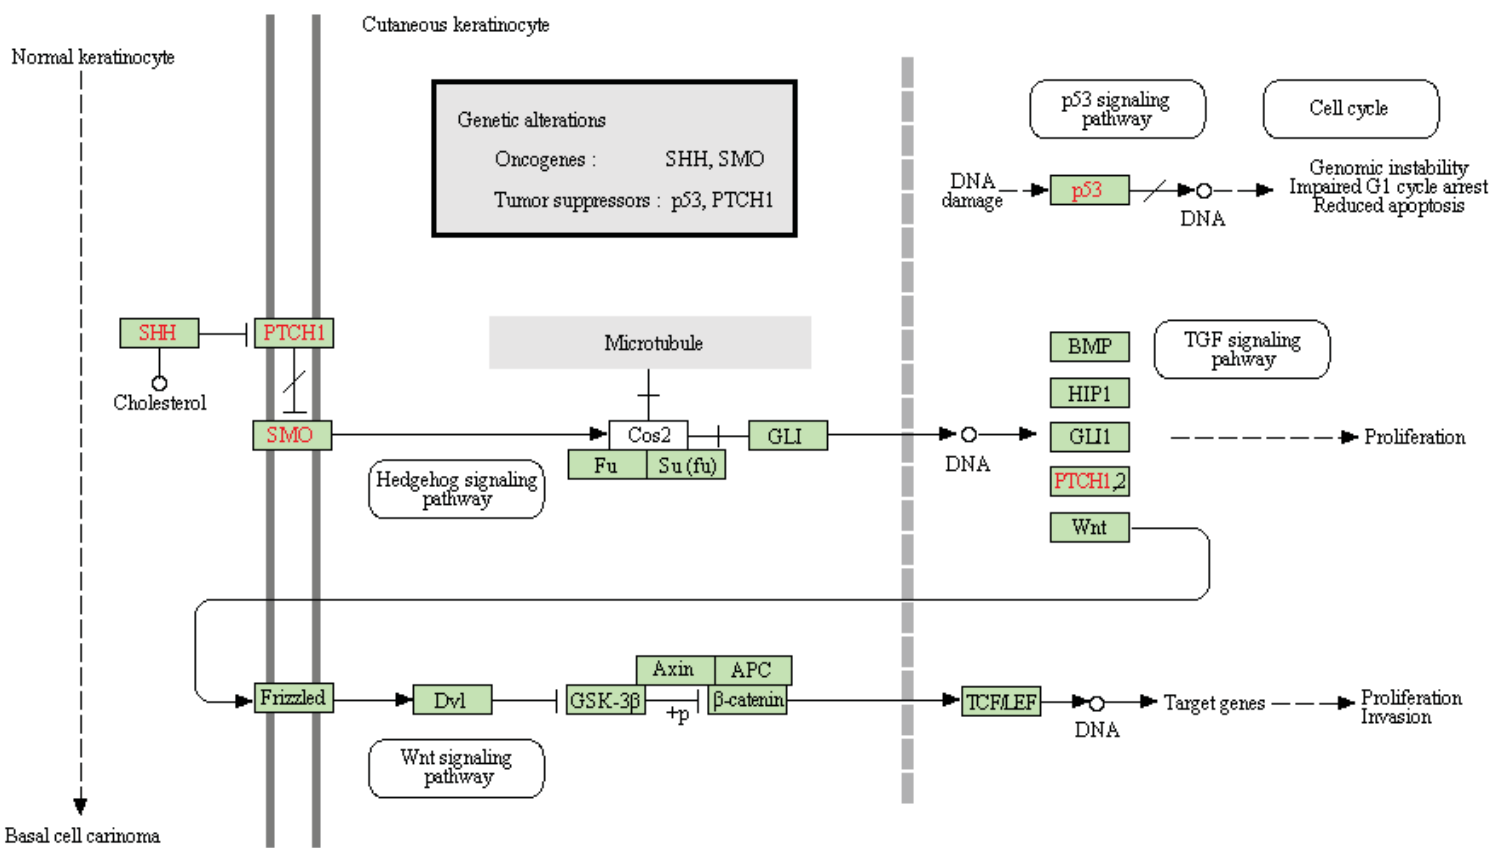

**BLADDER CANCER**

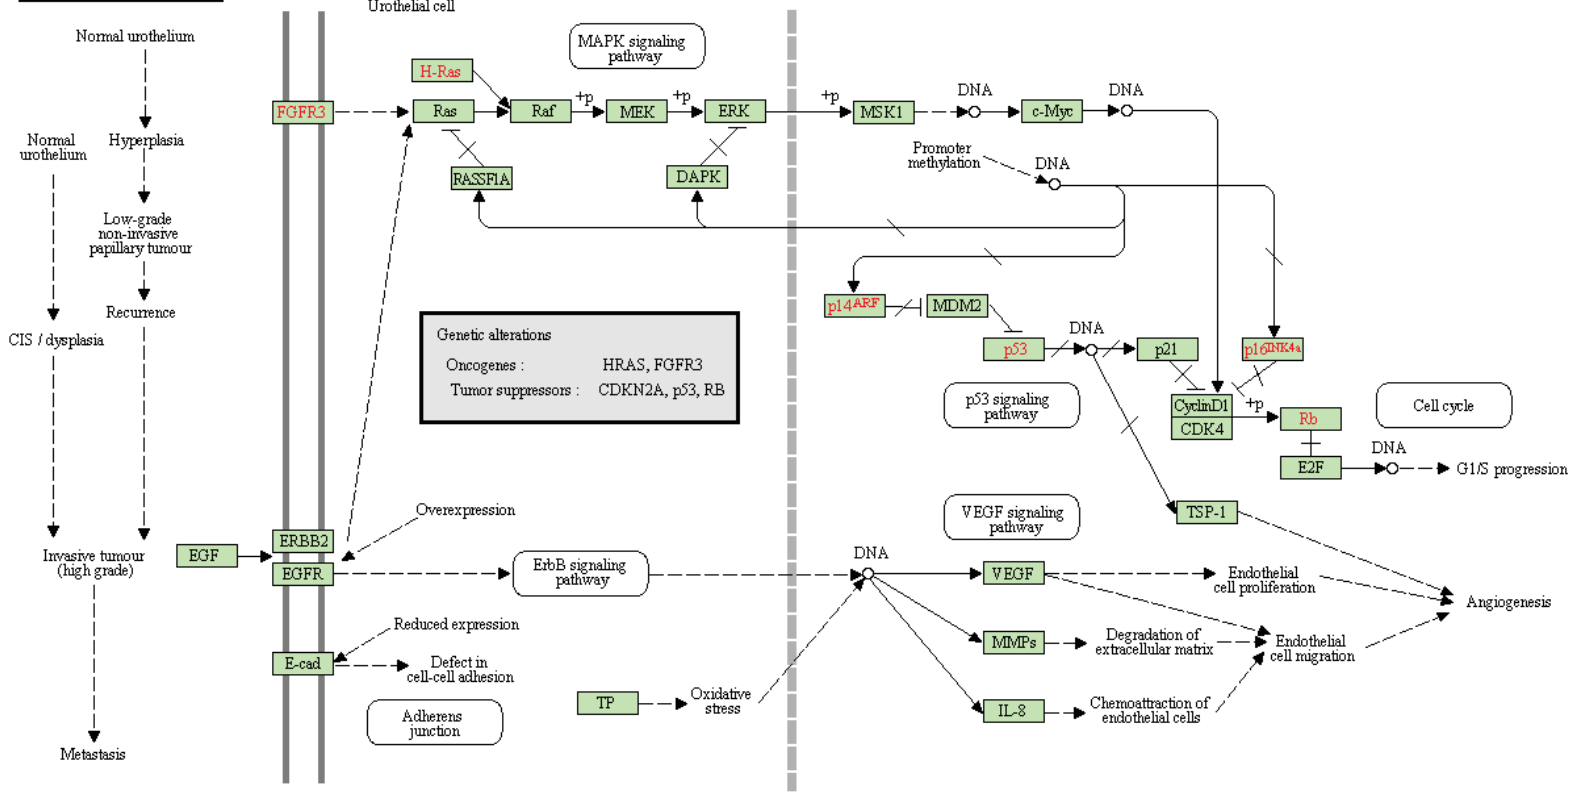

# CHRONIC MYELOID LEUKEMIA

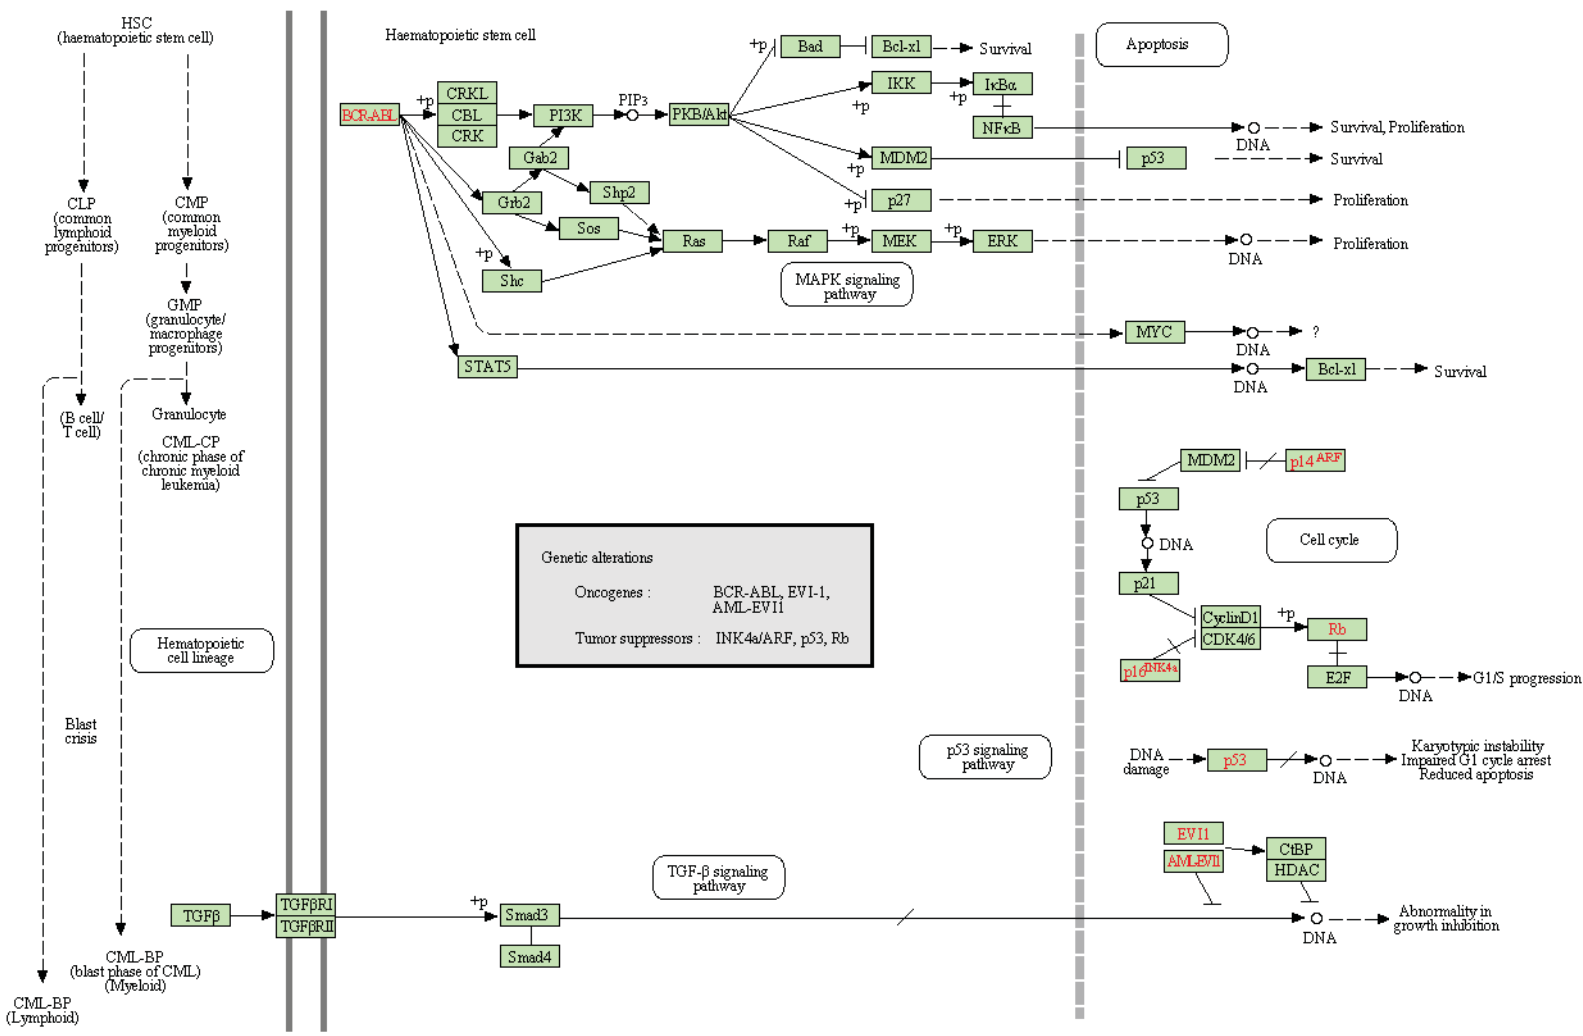

**COLORECTAL CANCER**

**Chromosome Unstable (CIN) pathway  
Microsatellite Unstable (MSI) pathway**

Normal epithelium

Dysplastic ACF

Early adenoma

Intermediate adenoma

Late adenoma

Carcinoma

Colorectal epithelial cell

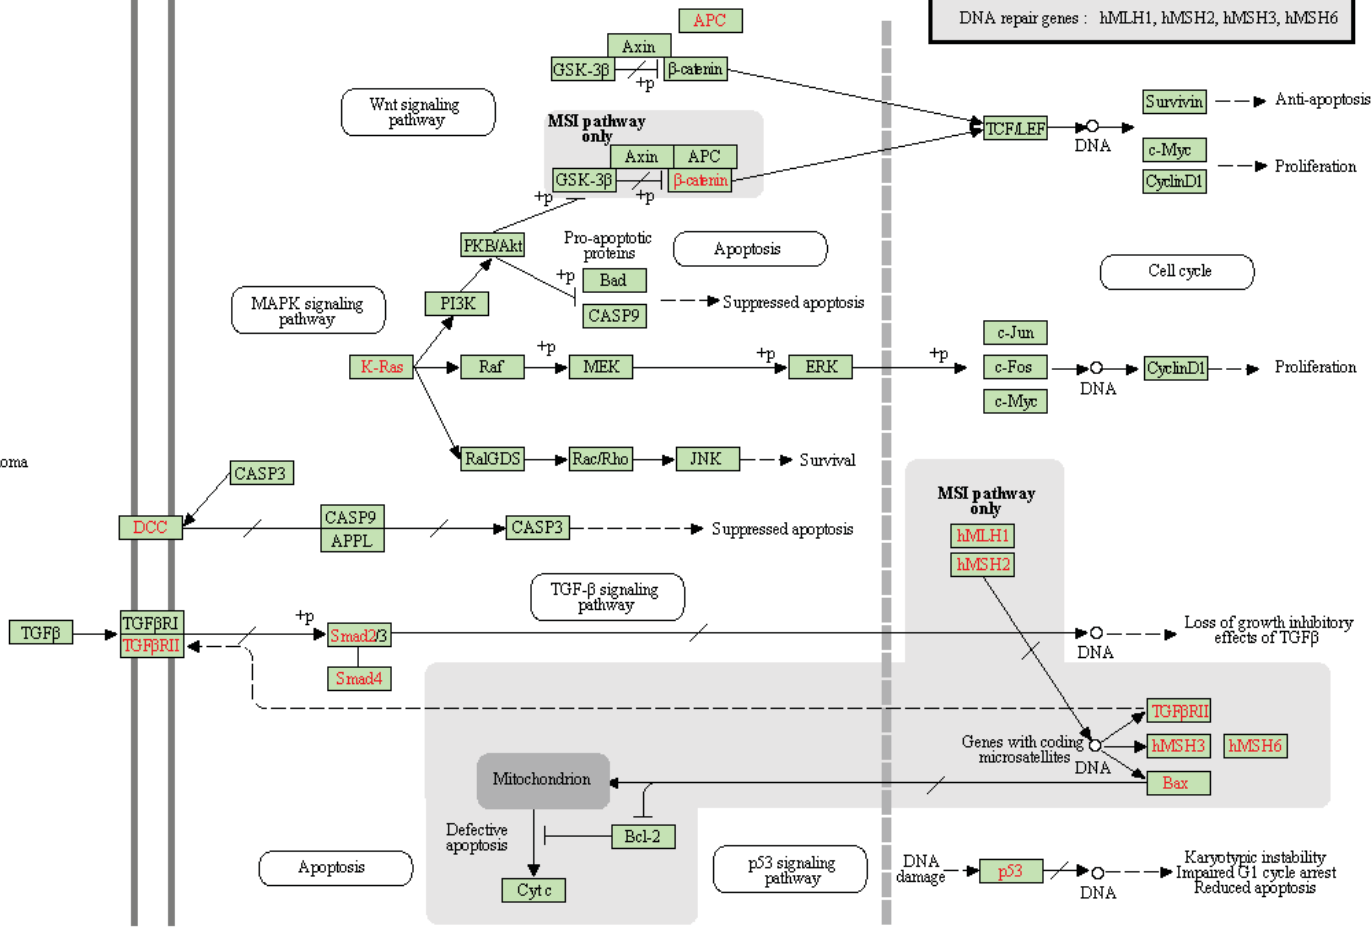

**Genetic alterations**

Oncogenes : β-catenin, K-Ras

Tumor suppressors : APC, DCC, TGFβRII, Smad2, Smad4, Bax, p53

DNA repair genes : hMLH1, hMSH2, hMSH3, hMSH6

**ENDOMETRIAL CANCER**

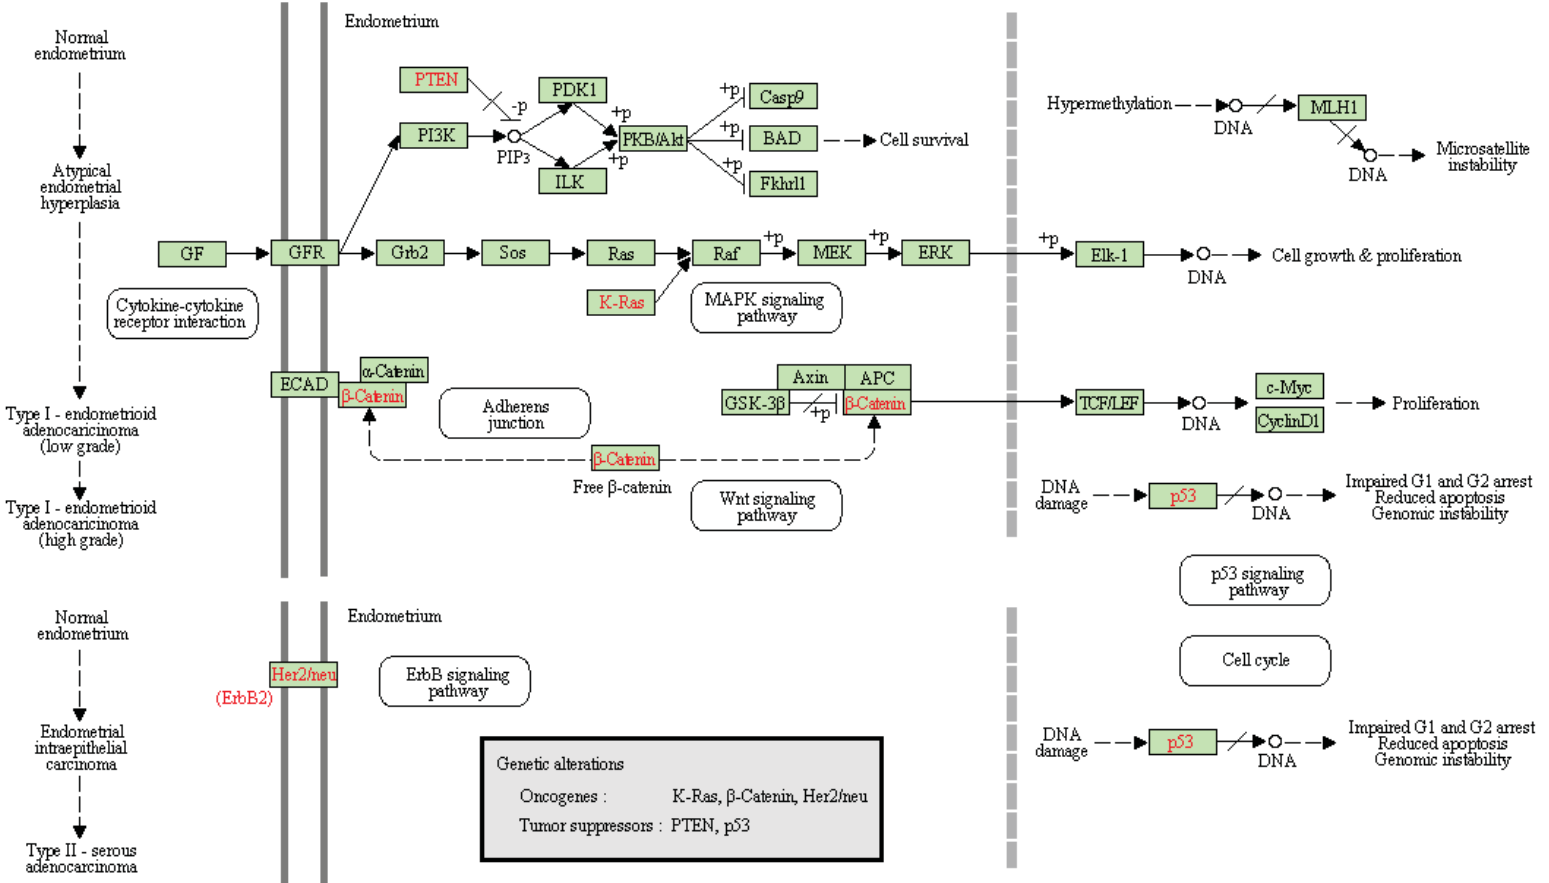

**GLIOMA**

**De Novo pathway**

Glial progenitor cell

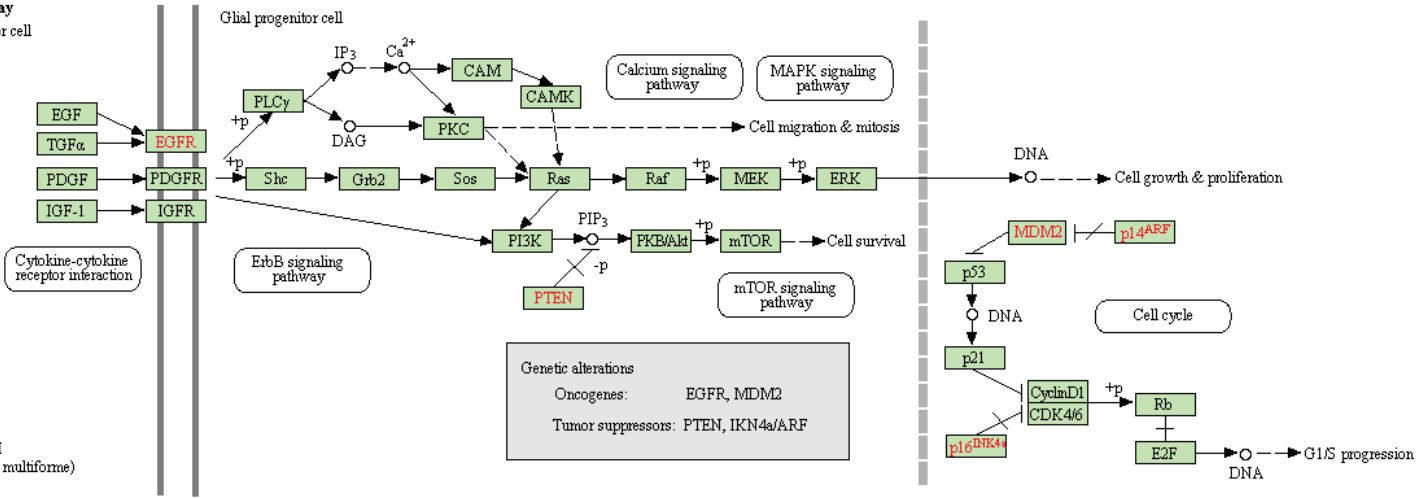

**Secondary pathway**

Glial progenitor cell

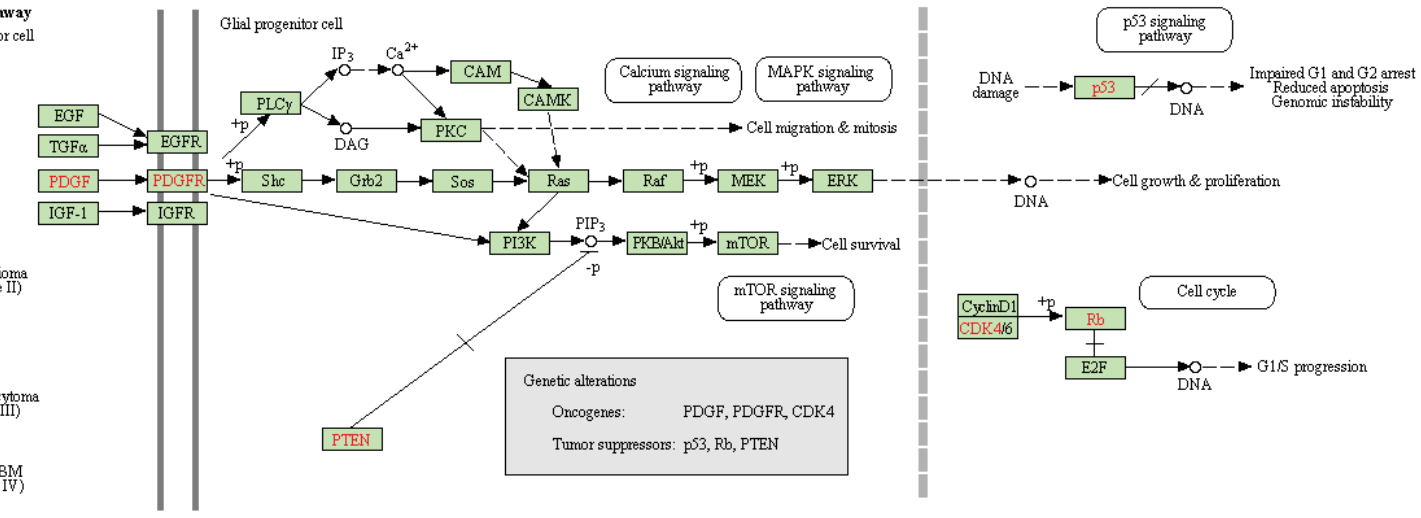



**MELANOMA**

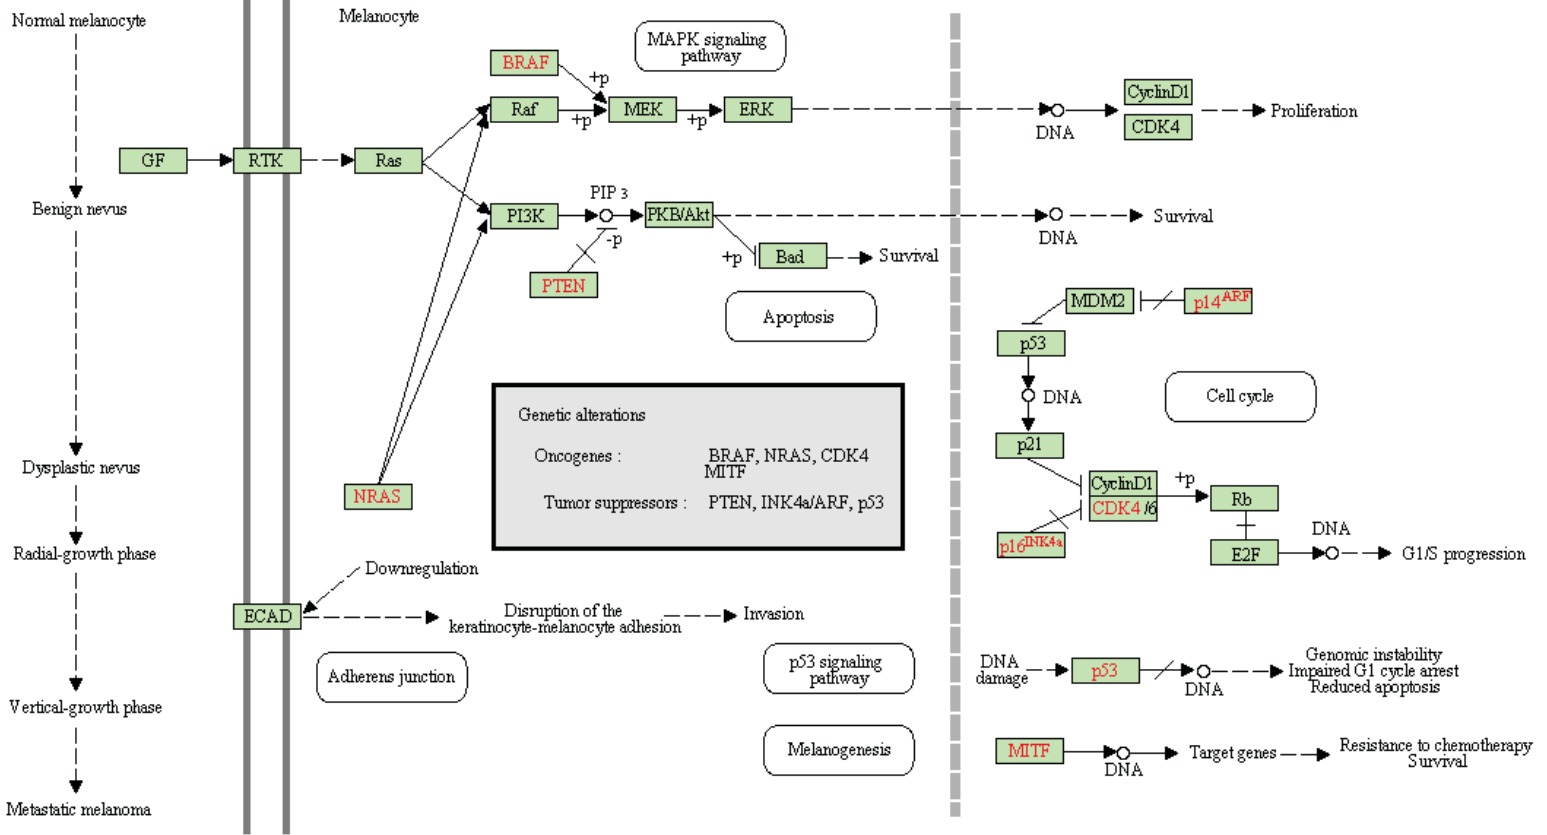

# NON-SMALL CELL LUNG CANCER

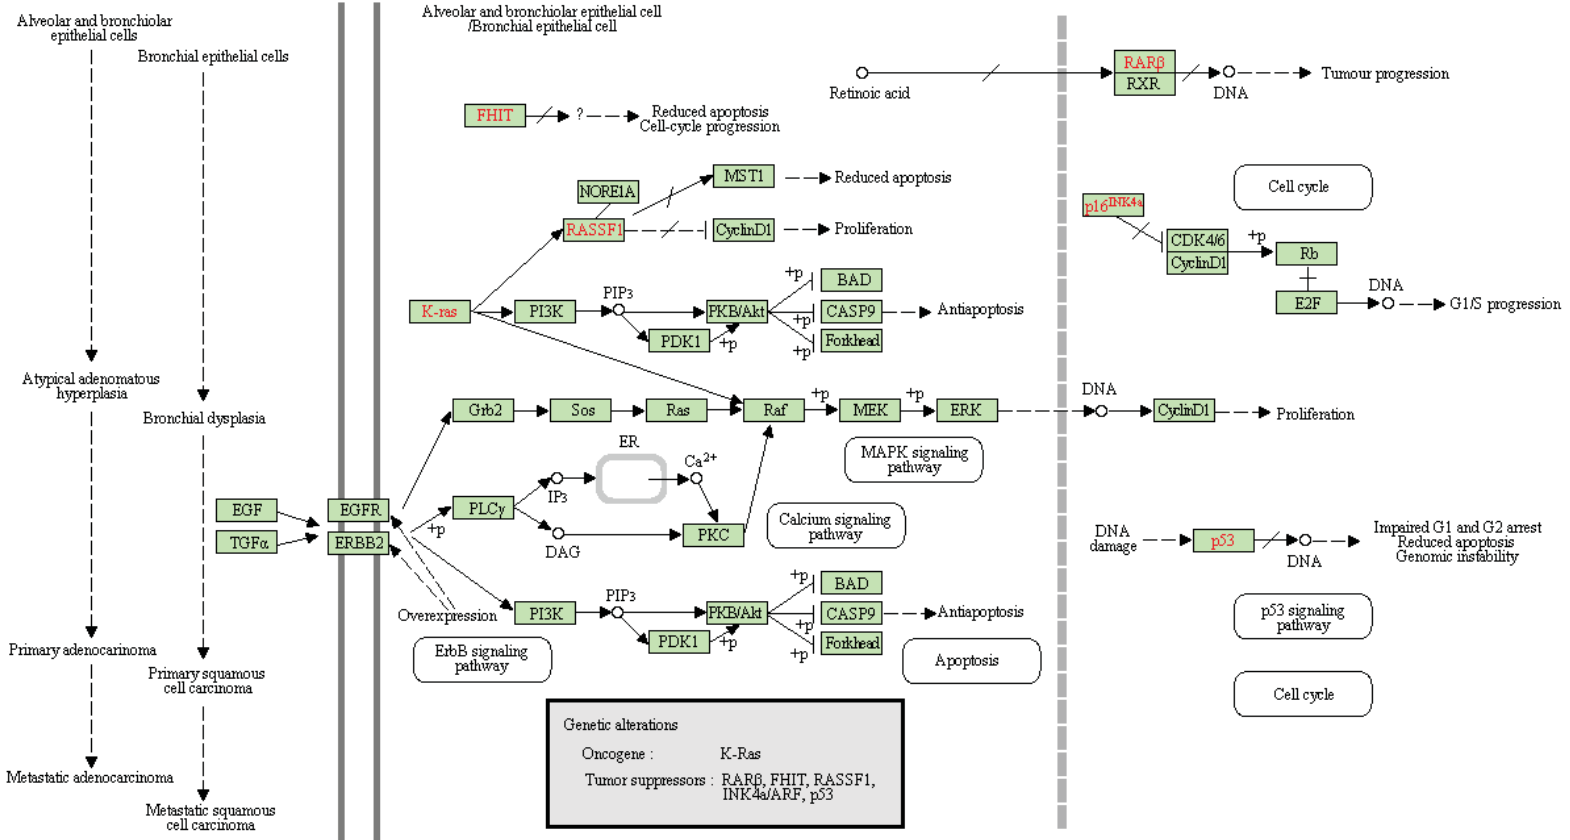

**PANCREATIC CANCER**

**Chromosome Unstable (CIN) pathway**

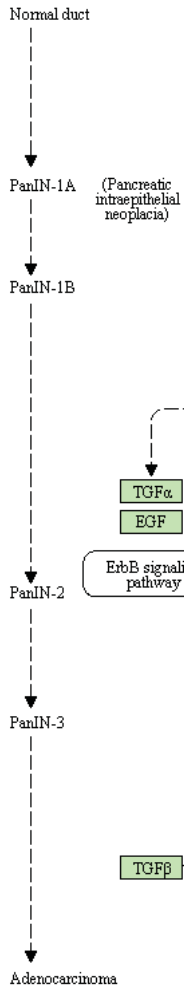

**Pancreatic ductal cell**

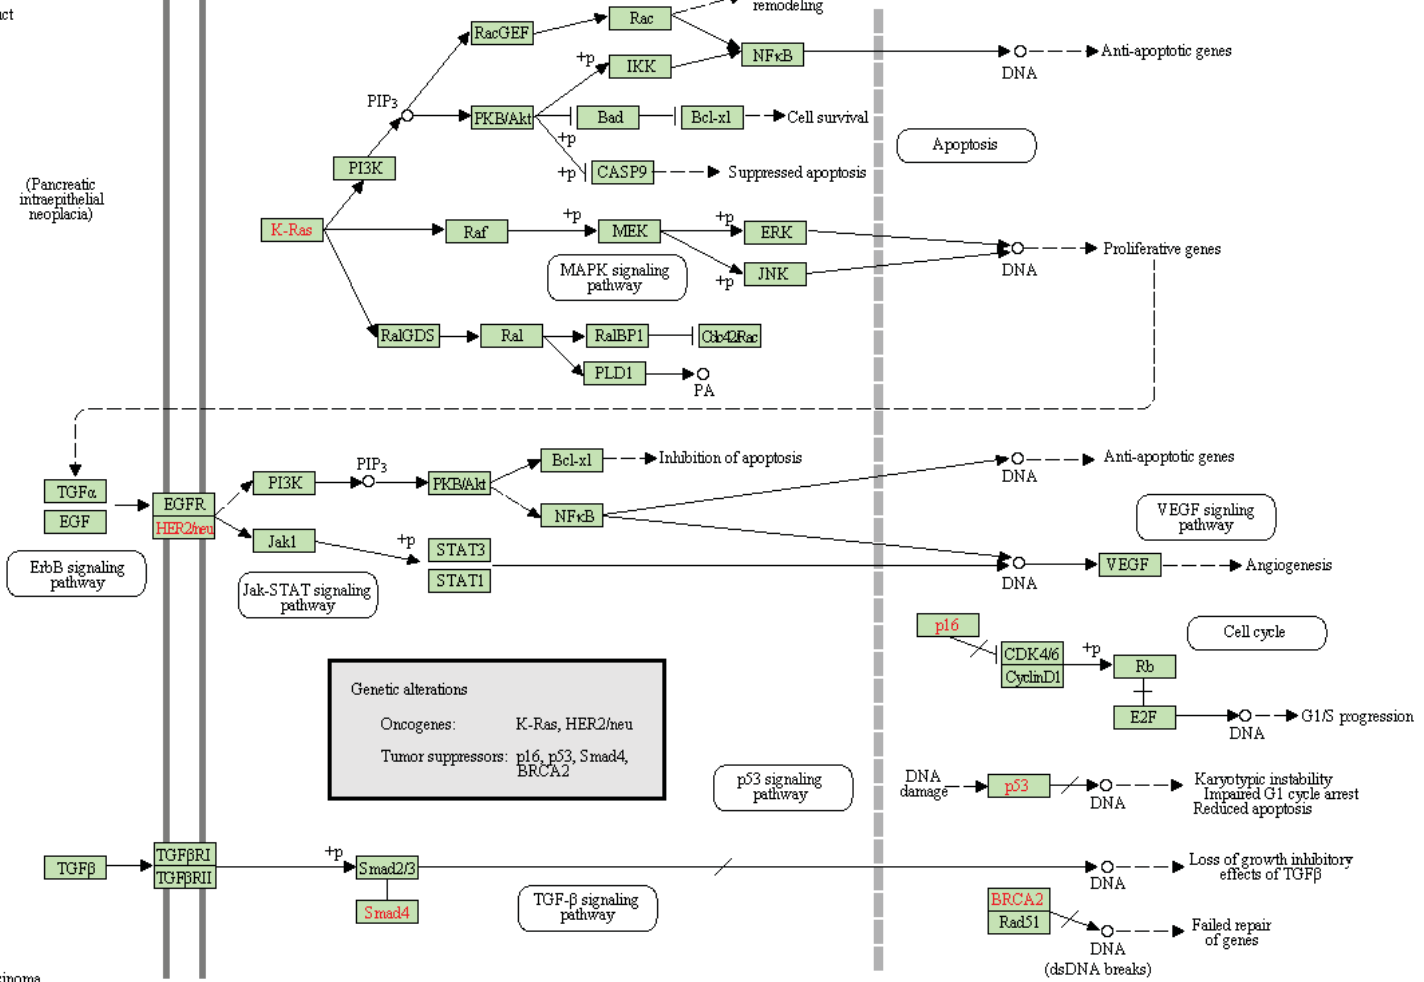

**PROSTATE CANCER**

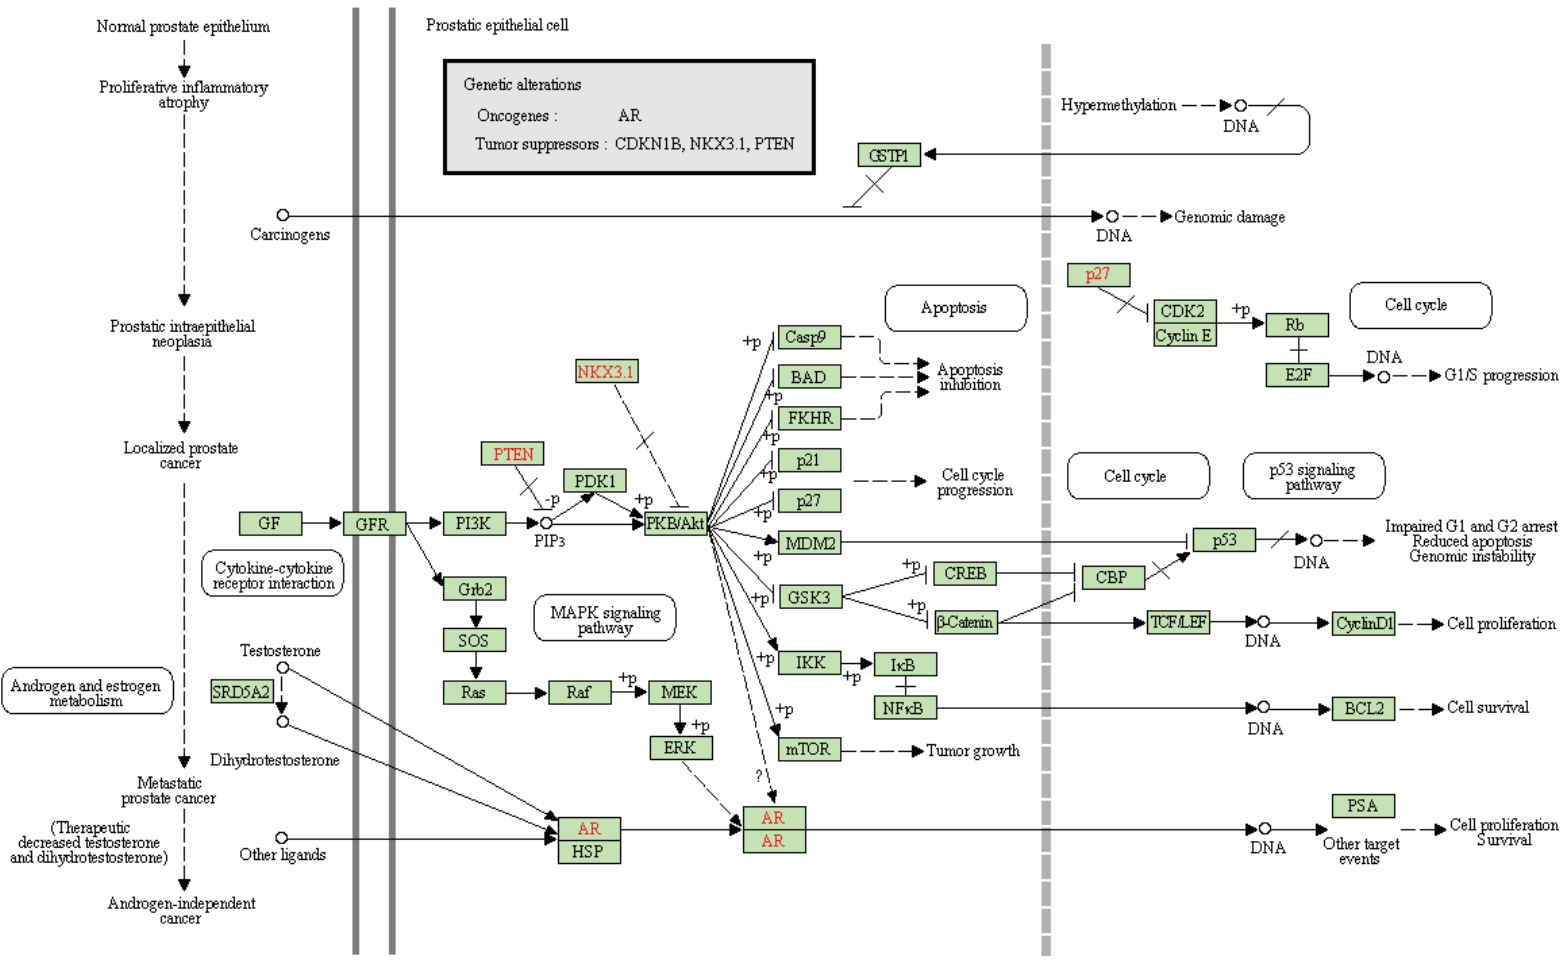

**RENAL CELL CARCINOMA**

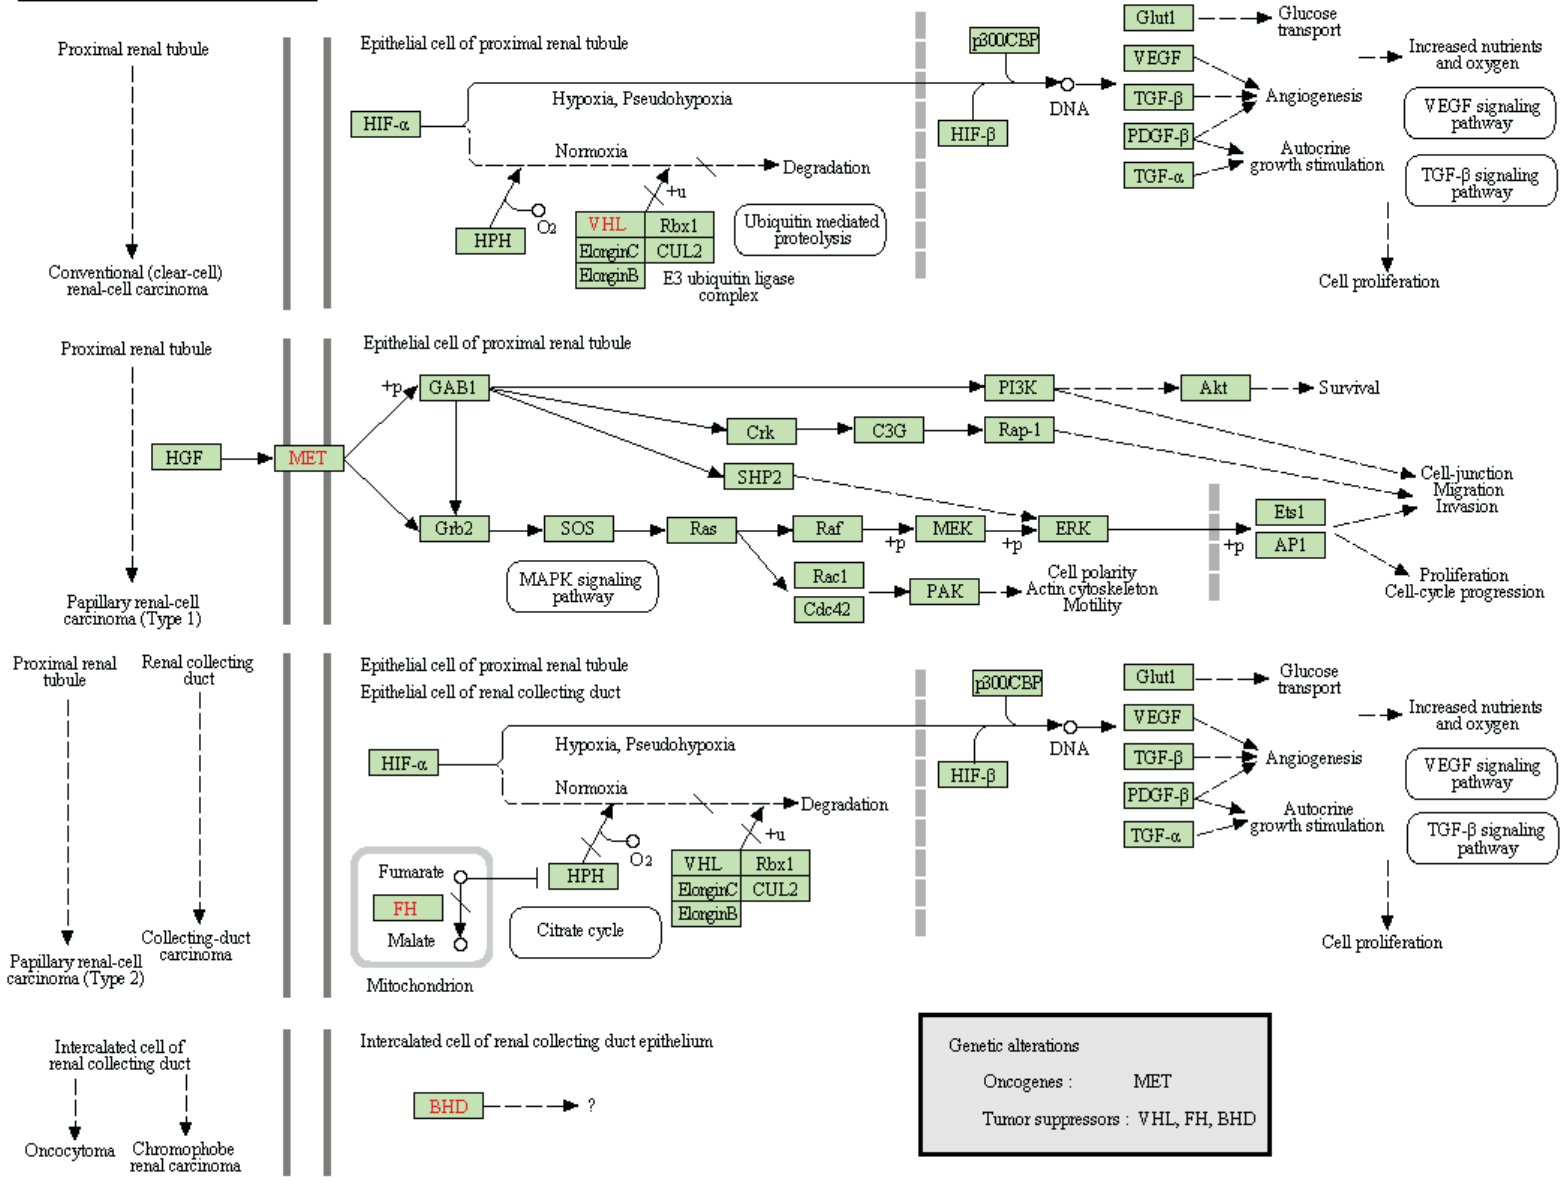

# SMALL CELL LUNG CANCER

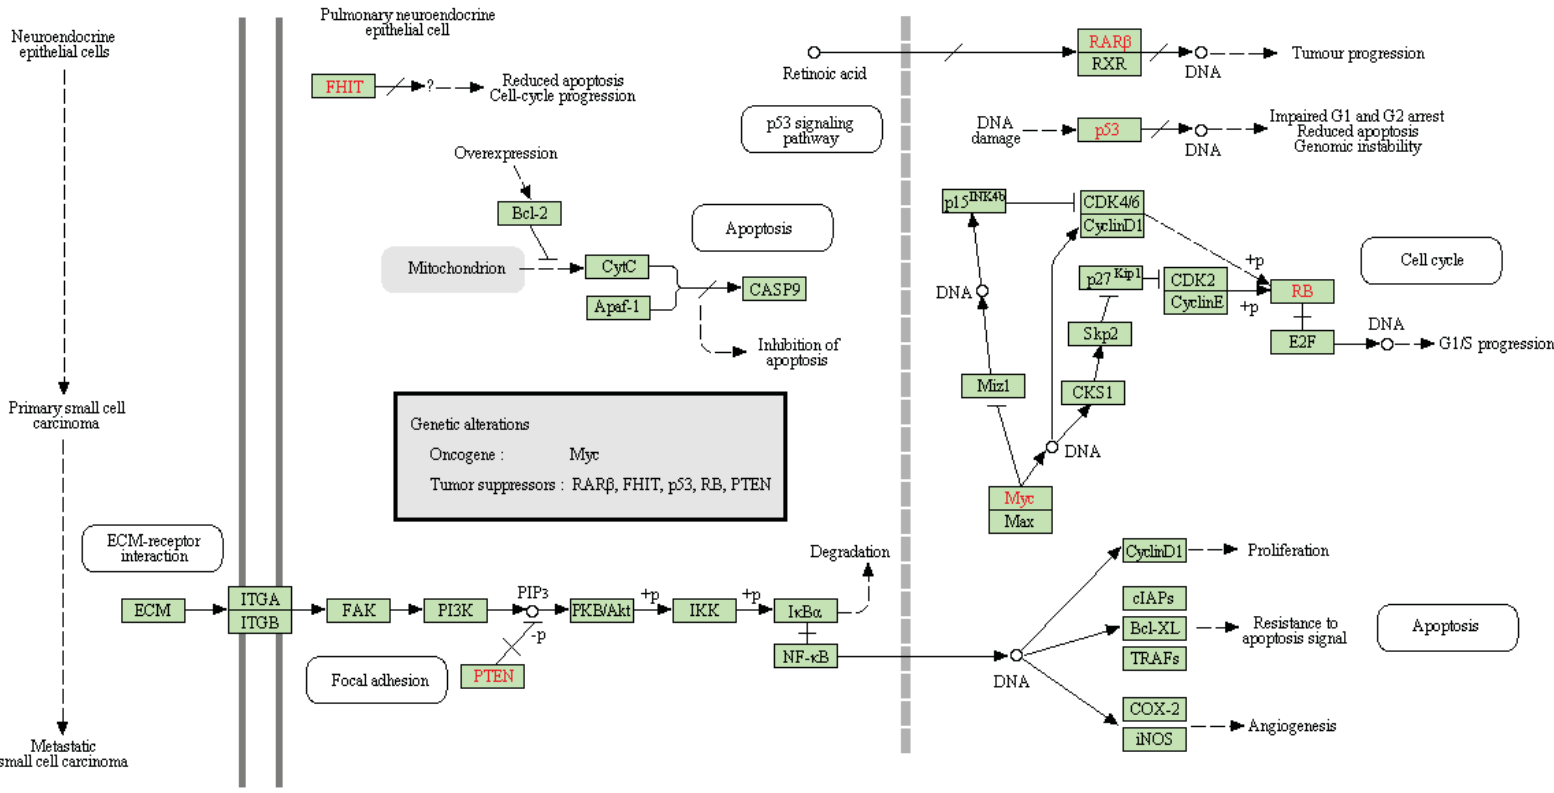

**THYROID CANCER**

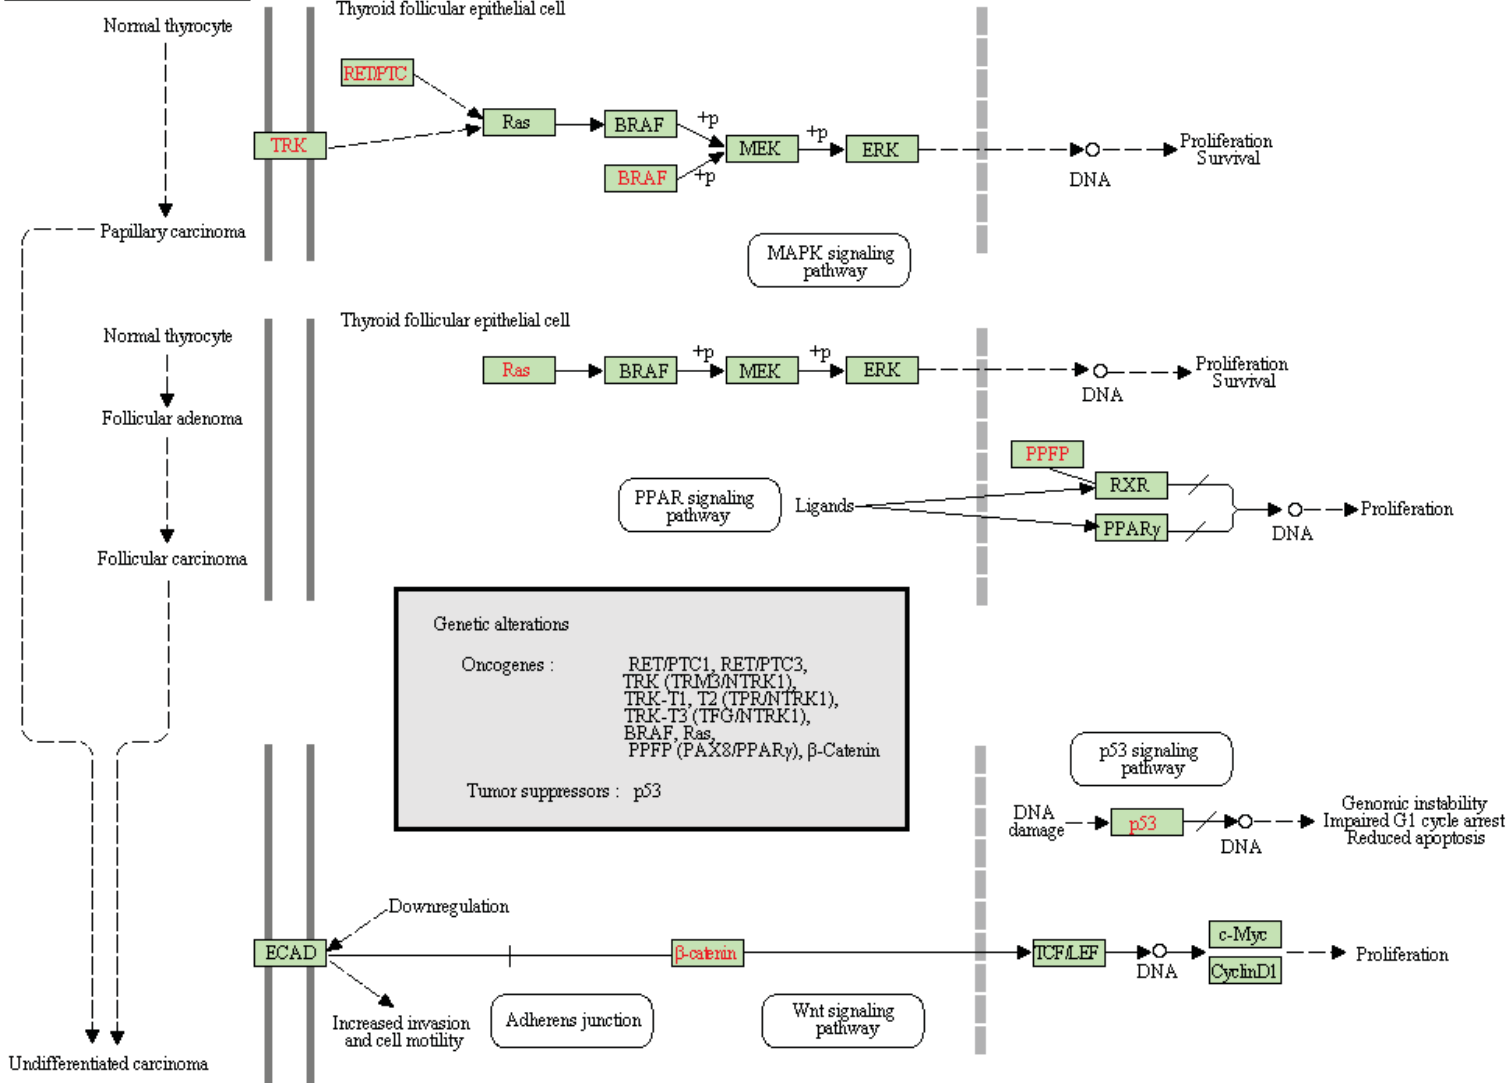

Supplement: 1201416109_sfig01.pdf [file 1201416109_sfig01.pdf]
