# Supplementary material
Source: PubMed Central journal article supplement (PMC3384193)
Supplement: 1201416109_pnas.201201416SI.pdf [file 1201416109_pnas.201201416SI.pdf]

# Supporting Information

Breitkreutz et al. 10.1073/pnas.1201416109

**Table S1. Cancer site PubMed searches**

| Search term               | Number of citations |
|---------------------------|---------------------|
| Colorectal cancer         | 142,745             |
| Prostate cancer           | 99,368              |
| Melanoma                  | 83,875              |
| Pancreatic cancer         | 60,567              |
| Glioma                    | 57,755              |
| Acute myeloid leukemia    | 54,034              |
| Bladder cancer            | 53,927              |
| Small cell lung cancer    | 50,108              |
| Thyroid cancer            | 49,300              |
| Nonsmall cell lung cancer | 37,301              |
| Renal cell carcinoma      | 29,586              |
| Chronic myeloid leukemia  | 23,980              |
| Endometrial cancer        | 23,963              |
| Basal cell carcinoma      | 19,579              |

Search terms corresponding to each of the cancer sites in the study were used to perform searches for on PubMed (<http://www.ncbi.nlm.nih.gov/pubmed/>) using the default (nonadvanced) search type. The total number of citation results returned by each search was recorded. The search terms are sorted in descending order of number of citations. The searches were performed on February 22, 2012.

**Fig. S1.** Diagrams of the Kyoto Encyclopedia of Genes and Genomes (KEGG) pathways for 14 cancer sites. The first page describes the symbols used on the diagrams, and each following page is the diagram for a specific cancer site. The sites are, in order: acute myeloid leukemia, basal cell carcinoma, bladder cancer, chronic myeloid leukemia, colorectal cancer, endometrial cancer, glioma, melanoma, nonsmall-cell lung cancer, pancreatic cancer, prostate cancer, renal cell carcinoma, small cell lung cancer, and thyroid cancer. All diagrams were downloaded from the KEGG PATHWAY Database (<http://www.genome.jp/kegg/pathway.html>).

[Fig. S1](#)

**Fig. S2.** Scatter plot showing the lack of correlation between the number of PubMed citations and degree-entropy. Datapoints are shown for 14 cancer sites, including all of the cancer sites with KEGG pathways. The  $x$  axis is the total number of citation results returned by a PubMed search for a search term corresponding to the cancer site. The  $y$  axis is the degree-entropy ( $H$ ) for the cancer site, calculated from the KEGG pathway. No correlation was observed, with  $R^2 = 0.0$  for a linear regression fit.

[Fig. S2](#)
