# Supplementary material
Source: PubMed Central journal article supplement (PMC3384193)

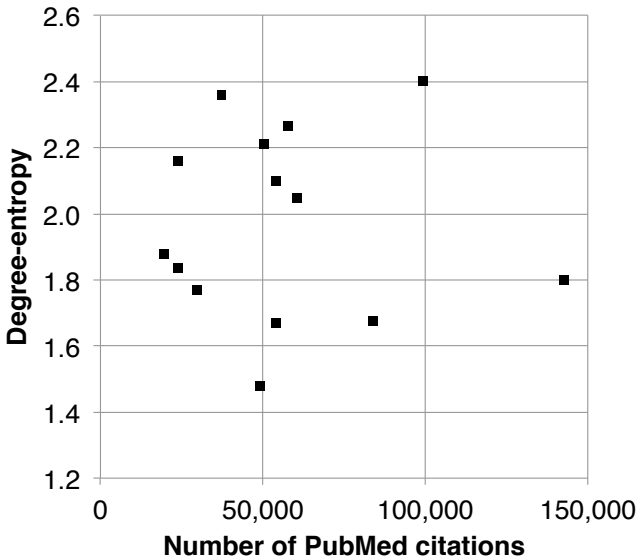

Supplement: 1201416109_sfig02.pdf [file 1201416109_sfig02.pdf]
